# Supplementary material for: Geospatial characterization of immune cell distributions and dynamics across the microenvironment in clear cell renal cell carcinoma
Source: HighWire-hosted journal article supplement (doi:10.1136/jitc-2022-006195), 2023-04-01
Supplement: jitc-2022-006195supp005_data_supplement.pdf [file jitc-2022-006195supp005_data_supplement.pdf]

## Supplemental RNA Sequencing Analysis Methods

### Step 0: Trim sequence reads

- Remove adapters from raw FASTQ sequence reads with cutadapt 1.16.

```
cutadapt \  
  -m 30 \  
  -a <ADPT_R1> \  
  -A <ADPT_R2> \  
  -o <FASTQ.1> \  
  -p <FASTQ.2> \  
  --trim-n \  
  --cores 4 \  
  <IN_FASTQ.1> \  
  <IN_FASTQ.2>
```

### Step 1: Sequence Alignment with Star 2.5.3a and samtools 1.1

```
STAR --runThreadN 5 \  
  --genomeDir <ref_genome_dir>1 \  
  --outSAMtype BAM SortedByCoordinate \  
  --readFilesCommand zcat \  
  --twopassMode Basic \  
  --chimOutType SeparateSAMold \  
  --outFilterMismatchNoverLmax 0.04 \  
  --chimSegmentMin 10 \  
  --sjdbGTFfile <gene_model_gtf>2 \  
  --readFilesIn <IN_FASTQ.1> <IN_FASTQ.2> \  
  --outReadsUnmapped Fastx
```

```
samtools index Aligned.sortedByCoord.out.bam  
samtools index Aligned.toTranscriptome.out.bam
```

<sup>1</sup>hs37d5 was used in this study.

<sup>2</sup>RefGene gene models were used in this study.

### Step 2: Gene level quantification using HTSeq 0.6.1

```
samtools sort -n -m 8G Aligned.sortedByCoord.out.bam sample.star_sortByName  
  
htseq-count -f bam -m union -s reverse \  
  -i gene_id sample.star_sortByName.bam <gene_model_gtf> \  
  >sample.star.cnt
```

### Step 3: Expression normalization with IRON (PMC3651355)

```
# Read counts normalized against median sample SL278658:  
iron_generic --rnaseq --norm-iron="SL278658" expression.txt \  
  > norm_expression.txt
```
