# Supplementary material for: Geospatial characterization of immune cell distributions and dynamics across the microenvironment in clear cell renal cell carcinoma
Source: HighWire-hosted journal article supplement (doi:10.1136/jitc-2022-006195), 2023-04-01
Supplement: jitc-2022-006195supp006_data_supplement.pdf [file jitc-2022-006195supp006_data_supplement.pdf]

**Supplemental Whole Exome Sequencing Analysis Methods**  
**Somatic mutation detection; adapted from Teer et al “Evaluating somatic tumor mutation detection without matched normal samples” Hum Genomics 2017.**  
**< PMC5584341>**

Settings were initially informed by 1000 Genomes phase 2 and GATK best practices:  
[ftp://ftp-trace.ncbi.nih.gov/1000genomes/ftp/README.alignment\\_data](ftp://ftp-trace.ncbi.nih.gov/1000genomes/ftp/README.alignment_data)  
[https://www.broadinstitute.org/gatk/guide/pdfdocs/GATK\\_GuideBook\\_2.3-9.pdf](https://www.broadinstitute.org/gatk/guide/pdfdocs/GATK_GuideBook_2.3-9.pdf)  
 GATK\_Lite 2.2-16 was used - settings may be different for other versions.

**Step 0: Trim sequence reads**

- Remove adapters from raw FASTQ sequence reads with cutadapt 1.16.

```
cutadapt \
  -m 30 \
  -a <ADPT_R1> \
  -A <ADPT_R2> \
  -o <FASTQ.1> \
  -p <FASTQ.2> \
  --trim-n \
  --cores 4 \
  <IN_FASTQ.1> \
  <IN_FASTQ.2>
```

**Step 1: Sequence Alignment**

- Align with BWA 0.7.7 (paired-end):

```
bwa aln -q 15 <reference>1 <FASTQ.1> -f <out.1.sai>
bwa aln -q 15 <reference> <FASTQ.2> -f <out.2.sai>
bwa sampe -a <max_insert_size>2 \
  -r "@RG\tID:${NAME}\tSM:${NAME}\tPL:ILLUMINA\tLB:${NAME}_lib" \
  <reference> \
  <out.1.sai> \
  <out.2.sai> \
  <FASTQ.1> \
  <FASTQ.2> \
  -f <out.sam>
```

<sup>1</sup>hs37d5 was used in this study.

<sup>2</sup>A value of 600 was used in this study.

**Step 2: SAM to BAM, sort, fixmate, add MD**

- Sort, correct with samtools 0.1.18:

```
samtools view -bSu <out.sam> | \
  samtools sort -n -o -m 3000000000 - <out.sort.tmp> | \
  samtools fixmate /dev/stdin /dev/stdout | \
  samtools sort -o -m 3000000000 - <out.csort.tmp> | \
  samtools fillmd -b - <reference.fa> \
  > <out.fixed.bam>
```

**Step 3: Mark duplicates**

- Mark duplicates with Picard 1.82:

```
java -Xmx6g -jar MarkDuplicates.jar \  
  INPUT=<out.fixed.bam> \  
  OUTPUT=<out.dup.bam> \  
  ASSUME_SORTED=TRUE \  
  VALIDATION_STRINGENCY=LENIENT \  
  METRICS_FILE=<out.dup.metrics> \  
  CREATE_INDEX=TRUE
```

**Step 4: Realign around indels**

- low\_coverage and mills\_devine indel VCFs from GATK bundle
- Indel Realignment with GATK Lite 2.2-16:

```
java -Xmx6g -jar GenomeAnalysisTK.jar \  
  -T RealignerTargetCreator \  
  -R <reference.fa> \  
  -I <out.dup.bam> \  
  -o <out.intervals> \  
  -known <low_coverage_indels.vcf> \  
  -known <mills_devine_indels.vcf>
```

```
java -Xmx6g -jar GenomeAnalysisTK.jar \  
  -T IndelRealigner \  
  -R <reference.fa> \  
  -I <out.dup.bam> \  
  -targetIntervals <out.intervals> \  
  -o <out.realign.bam> \  
  -known <low_coverage_indels.vcf> \  
  -known <mills_devine_indels.vcf> \  
  -LOD 4.0 \  
  -model USE_READS
```

**Step 5: Base quality recalibration**

- dbsnp.vcf from GATK bundle
- BQSR with GATK:

```
java -Xmx6g -jar GenomeAnalysisTK.jar \  
  -T BaseRecalibrator \  
  -l INFO \  
  -L <target_region> \  
  -R <reference.fa> \  
  -I <out.realign.bam> \  
  -knownSites <dbsnp.vcf> \  
  --disable_indel_qual \  
  -cov ReadGroupCovariate \  
  -cov QualityScoreCovariate \  
  -cov CycleCovariate \  
  -cov ContextCovariate \  
  -o <out.recal_data>
```

```
java -Xmx6g -jar GenomeAnalysisTK.jar \  
  -T PrintReads \  
  -l INFO \  
  -R <reference.fa>
```

```
-I <out.realign.bam> \  
-o <out.recal.bam> \  
--disable_indel_qual <out.recal_data>  
-BQSR <out.recal_data>
```

### Step 6: Add MD tag and index final BAM

- Add MD tag with samtools:

```
samtools calmd -Erb <out.recal.bam> <reference.fa> \  
> <out.bam>  
samtools index <out.bam>
```

### Step 7: Collect metrics

- Get alignment metrics with Picard

```
java -Xmx6g -jar CollectMultipleMetrics.jar \  
  INPUT=<out.bam> \  
  REFERENCE_SEQUENCE=<reference.fa> \  
  OUTPUT=<out.stats> \  
  VALIDATION_STATUS=LENIENT
```

### Step 8a: Somatic mutation calling with Strelka 1.0.13 and Tabix 0.2.5

```
## Strelka with more sensitive settings  
## (reduce snv and indel noise levels 10x: in config.ini)  
cat strelka_config_bwa_exome.ini \  
  | sed -e 's/ssnvNoise = 0.0000005/ssnvNoise = 0.00000005/' \  
        -e 's/sindelNoise = 0.000001/sindelNoise = 0.0000001/' \  
  > config.ini  
  
# Configure strelka run  
configureStrelkaWorkflow.pl \  
  --normal=<normal.bam> \  
  --tumor=<tumor.bam> \  
  --ref=<reference.fa> \  
  --config=config.ini \  
  --output-dir=<sample>  
  
# Run in <sample> directory  
make -j 4  
  
# Add genotypes to "all" and "pass" outputs  
for type in all passed;  
do  
  
  bgzip results/${type}.somatic.snvs.vcf  
  tabix -p vcf results/${type}.somatic.snvs.vcf.gz  
  
  zgrep '^##[IF]' results/${type}.somatic.snvs.vcf.gz \  
    > ${type}.somatic.vcf  
  sed -e 's/BCNoise/BCNoise_indel/g' -e 's/DP/DP_indel/g' \  
    results/${type}.somatic.indels.vcf \  
    > ${type}.somatic.indels.format.vcf  
  zgrep --no-filename '^##[IF]' results/${type}.somatic.snvs.vcf.gz \  
    ${type}.somatic.indels.format.vcf | sort \  

```

```

| uniq >> ${type}.somatic.vcf
zgrep '^#CHROM' results/${type}.somatic.snvs.vcf.gz | sed -e \
"s/NORMAL/<normal_name>/" -e "s/TUMOR/<tumor_name>/" \
>> ${type}.somatic.vcf
zgrep --no-filename -v '^#' results/${type}.somatic.snvs.vcf.gz \
${type}.somatic.indels.format.vcf \
| sort -S 20G -k 1,1n -k 2,2n \
| perl -a -F"\t" -nle
'if ($F[0] =~ /([MXY]T?)/){
    push @{$c{$1}}, $_
}elsif($F[0] =~ /^[0-9]+$/){
    print( join "\t", @F )
};
END{
    for my $k ("X","Y","MT"){
        foreach (@{$c{$k}}) {print $_
        }
    }' >> ${type}.somatic.vcf
bgzip ${type}.somatic.vcf
perl strelka_add_genotype_vcf.pl3 --vcf ${type}.somatic.vcf.gz \
> unmerged.${type}.tumor.vcf
perl strelka_merge_genotypes_vcf.pl3 unmerged.${type}.tumor.vcf \
| bgzip -c > ${type}.<output_name>.tumor.vcf.gz
tabix -p vcf ${type}.<output_name>.tumor.vcf.gz

```

done

<sup>3</sup>See supplemental code files.

### **Step 8b: Somatic mutation calling with MuTect 1.1.4 and Tabix 0.2.5**

```

# Run MuTect to get SNVs
java \
-Xmx10G \
-jar mutect.jar \
--analysis_type MuTect \
--reference_sequence <reference.fa> \
--cosmic <cosmic_coding_mutations.vcf>\
--dbsnp <dbsnp.vcf> \
--intervals <target_regions> \
--input_file:normal <normal.bam> \
--input_file:tumor <tumor.bam> \
--out <sample.out> \
--vcf <sample.snvs.vcf> \
--enable_extended_output \
--max_alt_alleles_in_normal_count 3 \
--max_alt_allele_in_normal_fraction 0.05 \
--coverage_file <sample.cov.wig>

```

```

# Run MuTect to get Indels with GATK Lite 2.2-16
java \
-Xmx10G \
-jar GenomeAnalysisTK.jar \
--analysis_type SomaticIndelDetector \
--reference_sequence <reference.fa> \

```

```

--intervals <target_regions> \
--input_file:normal <normal.bam> \
--input_file:tumor <tumor.bam> \
--out <sample.indel.vcf>
# merge SNV and Indel mutations
perl mutect_correct_vcf.pl3 \
--snv_vcf <sample.snv.vcf> \
--indel_vcf <sample.indel.vcf> \
--out <sample.out> \
--tumor_sample <tumor_name> \
--normal_sample <normal_name> \
--tumor_only \
--pass_only

(grep '^##' sample_tumor.snv.vcf; \
grep -P \
'^##.*(ID=MM|ID=MQS|ID=NQSBQ|ID=NQSMM|ID=REnd|ID=RStart|ID=SC)|^##Somat
icIndelDetector' \
sample_tumor.indel.vcf) > sample.tumor.vcf
grep '^#CHROM' sample_tumor.snv.vcf >> sample.tumor.vcf

grep -hv '^#' sample_tumor.snv.vcf sample_tumor.indel.vcf \
| sort -S 10G -k 1,1n -k 2,2n \
| perl -a -F"\t" -nle
'if ($F[0] =~ /([MXY]T?)/){
push @{$c{$1}}, $_
}elsif($F[0] =~ /^[0-9]+$/){
print( join "\t", @F )
};
END{
for my $k ("X","Y","MT"){
foreach (@{$c{$k}}) {print $_
}
}' >> sample.tumor.vcf

bgzip sample.tumor.vcf
tabix -p vcf sample.tumor.vcf.gz

```

### Step 9: Merge MuTect and Strelka outputs using vcftools 0.1.15

```

vcf-merge \
-s -t -c any \
${mutectVCFs} \
> mutect_tumor.vcf; \
bgzip mutect_tumor.vcf; \
tabix -p vcf mutect_tumor.vcf.gz

vcf-merge \
-s -t -c any \
${strelkaVCFs} \
> strelka_tumor.vcf; \
bgzip strelka_tumor.vcf; \
tabix -p vcf strelka_tumor.vcf.gz

# merge MuTect and Strelka VCF files together

```

```
perl merge_strelka_mutect_asyn.pl \  
  --strelka_vcf strelka_tumor.vcf.gz \  
  --mutect_vcf mutect_tumor.vcf.gz \  
  > strelka_mutect.vcf
```

#### Step 10: Annotate with ANNOVAR

- Add predicted protein alterations
- Add 1000 Genomes allele frequencies

#### Step 11: Filter mutations bases on quality and context

- Mutations pass IF (called in Strelka as PASS) OR (called in Strelka as any AND called in MuTect)
- Mutations pass IF 1000 Genomes allele frequency is less than 1%.
- Mutations pass if they are predicted to alter protein sequence
- Passing mutations are summarized in a spreadsheet.
