# Supplementary material for: Geospatial characterization of immune cell distributions and dynamics across the microenvironment in clear cell renal cell carcinoma
Source: HighWire-hosted journal article supplement (doi:10.1136/jitc-2022-006195), 2023-04-01
Supplement: jitc-2022-006195supp008_data_supplement.xlsx [file jitc-2022-006195supp008_data_supplement.xlsx]

## Sheet: Sheet1
Key Resources Table
Reagent or Resource	Source	Identifier
Biologic Samples
Renal cell carcinoma primary tumor samples	Moffitt Total Cancer Care Tissue Core	N/A
Data
Renal cell carcinoma patient clinical data	Present study, available upon reasonable request	N/A
TCGA KIRC bulk RNA-seq and clinical data	https://www.cbioportal.org/study/clinicalData?id=kirc_tcga	N/A
Antibodies
CD68 (D4B9C) XP Rabbit mAb	Cell Signaling Technology, Danvers MA, USA	ID: 76437 RRID:AB_2799882
PD-L1 (E1L3N) XP Rabbit mAb	Cell Signaling Technology, Danvers MA, USA	ID: 13684 RRID:AB_2687655
T-bet/TBX21 (D6N8B) XP Rabbit mAb	Cell Signaling Technology, Danvers MA, USA	ID: 13232 RRID:AB_2616022
CD20 (L26) Mouse mAb	Agilent Dako, Santa Clara CA, USA	ID: GA604 RRID:AB_2282030
Cytokeratin (AE1/AE3) Mouse mAb	Agilent Dako, Santa Clara CA, USA	ID: GA053 RRID:AB_2132885
CD8 (C8/144B) Mouse mAb	Agilent Dako, Santa Clara CA, USA	ID: GA623 RRID:AB_2075537
CD163 (OTI2G12) Mouse mAb	Abcam, Waltham MA, USA	ID: ab156769 RRID: N/A
Mannose receptor CD206 (polyclonal) Rabbit mAb	Abcam, Waltham MA, USA	ID: ab64693 RRID:AB_1523910
FOXP3 (236A/E7) Mouse mAb	Abcam, Waltham MA, USA	ID: ab20034 RRID:AB_445284
CD3 (SP7) Rabbit mAb	ThermoFisher, Waltham MA, USA	ID: MA1-39551 RRID:AB_10988353
EGFR (polyclonal) Rabbit mAb	Sigma-Aldrich, St. Louis MO, USA	ID: HPA018530 RRID:AB_1848044
Commercial Assays
QIAseq DNA QuantiMIZE Kit	Qiagen, Germantown MD, USA	333414
Kapa Library Quantification Kit	Illumina, San Diego, CA, USA	N/A
TruSeq RNA Exome Kit	Illumina, San Diego, CA, USA	20020
Statistical software
R v4.0.2	https://www.r-project.org/	N/A
RegTools v0.5.2	https://github.com/griffithlab/regtools	N/A
bedtools v.2.21.0	https://github.com/arq5x/bedtools2	N/A
STAR	https://github.com/alexdobin/STAR	N/A
HTseq	https://github.com/simon-anders/htseq	N/A
DESeq2 package for R	https://bioconductor.org/packages/release/bioc/html/DESeq2.html	N/A
QIAseq smCounter v2	https://github.com/creggian/qiaseq-smcounter-v2	N/A
xCell	https://github.com/dviraran/xCell	N/A
spatstat package for R	https://spatstat.org/download.html	N/A
survival package for R	https://github.com/therneau/survival	N/A
survminer package for R	https://github.com/kassambara/survminer	N/A
ComplexHeatmap package for R	https://github.com/jokergoo/ComplexHeatmap	N/A
