# Supplementary figures and images for: Geospatial characterization of immune cell distributions and dynamics across the microenvironment in clear cell renal cell carcinoma
Source: HighWire-hosted journal article supplement (doi:10.1136/jitc-2022-006195), 2023-04-01

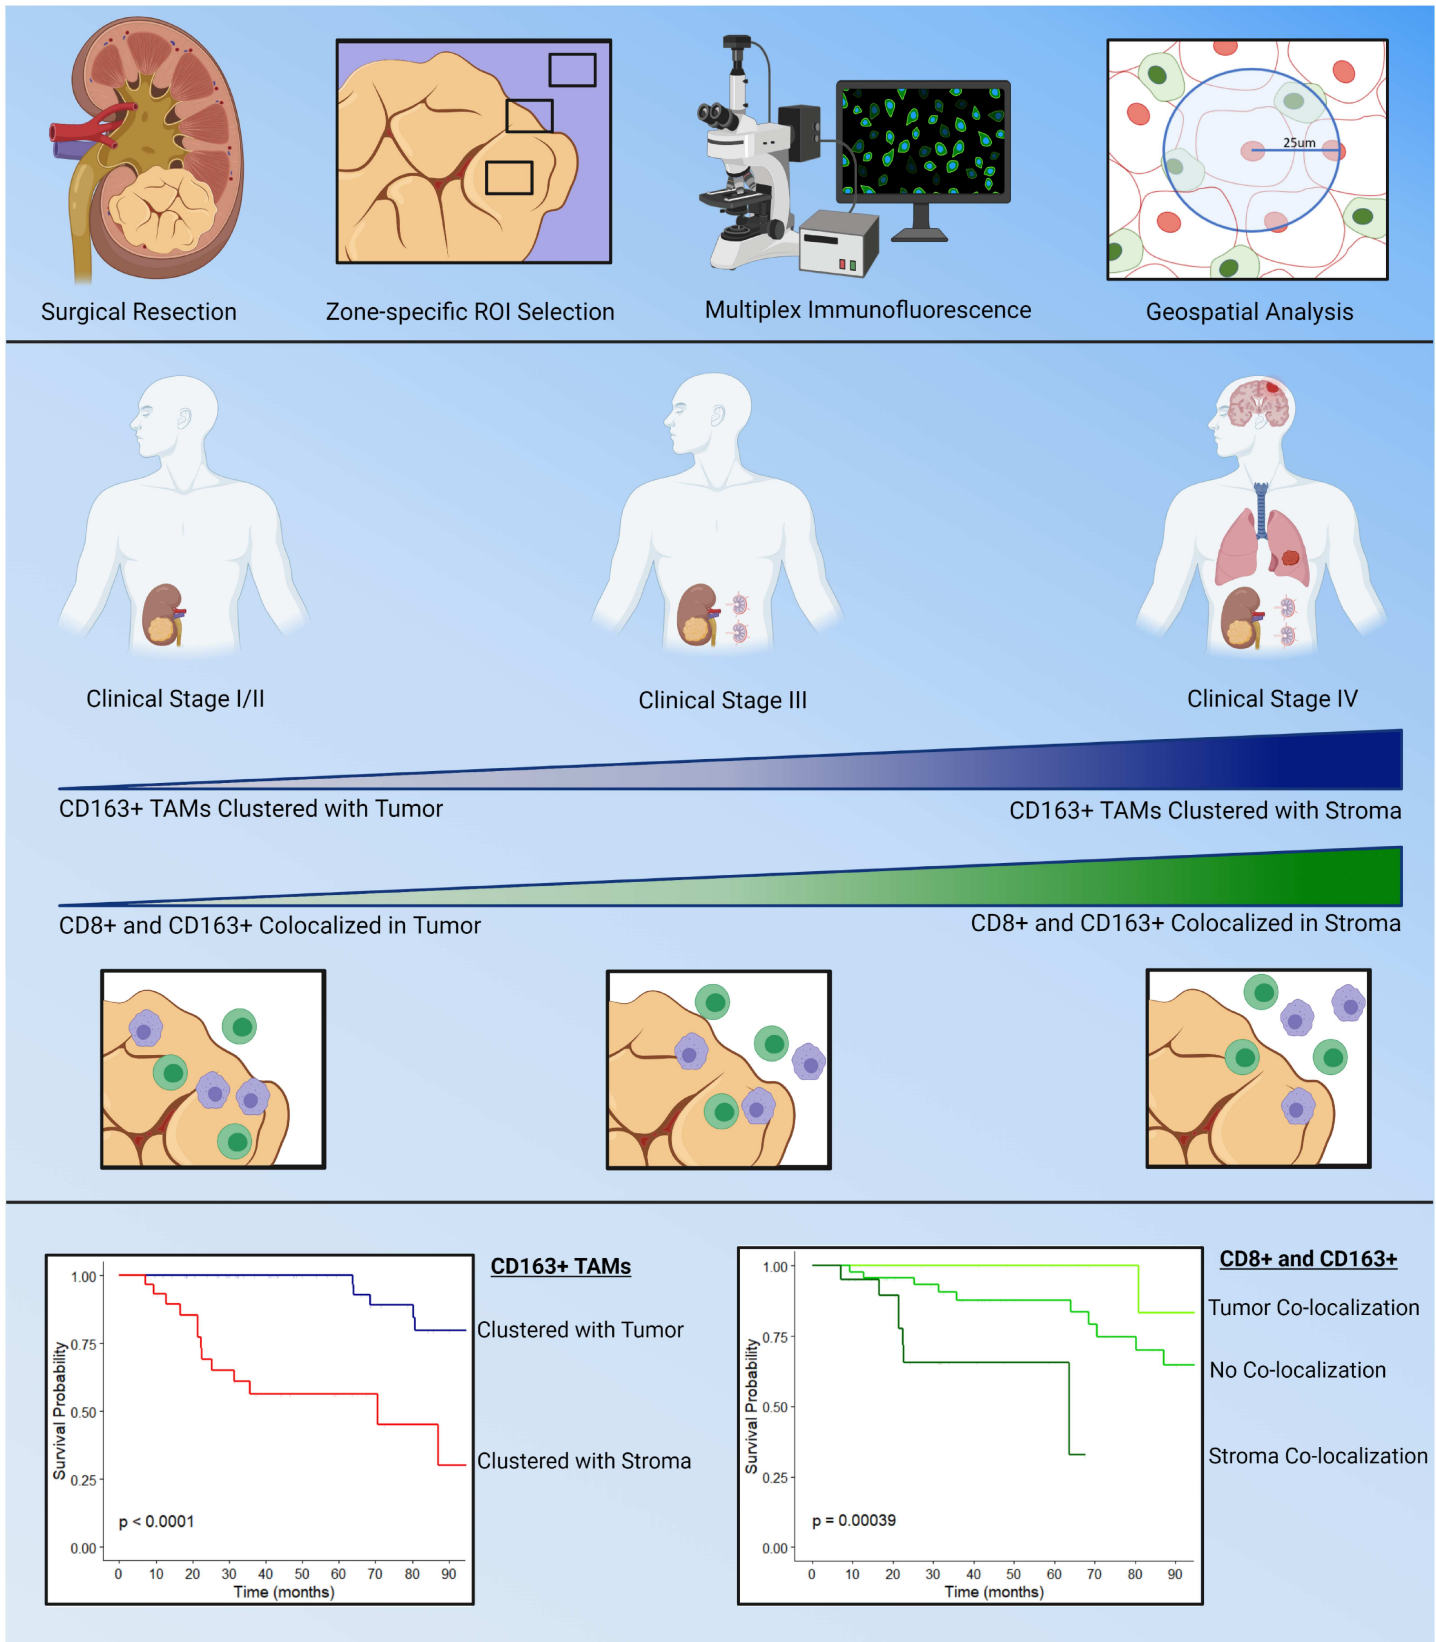

Supplement: jitc-2022-006195supp003_data_supplement.pdf [file jitc-2022-006195supp003_data_supplement.pdf]

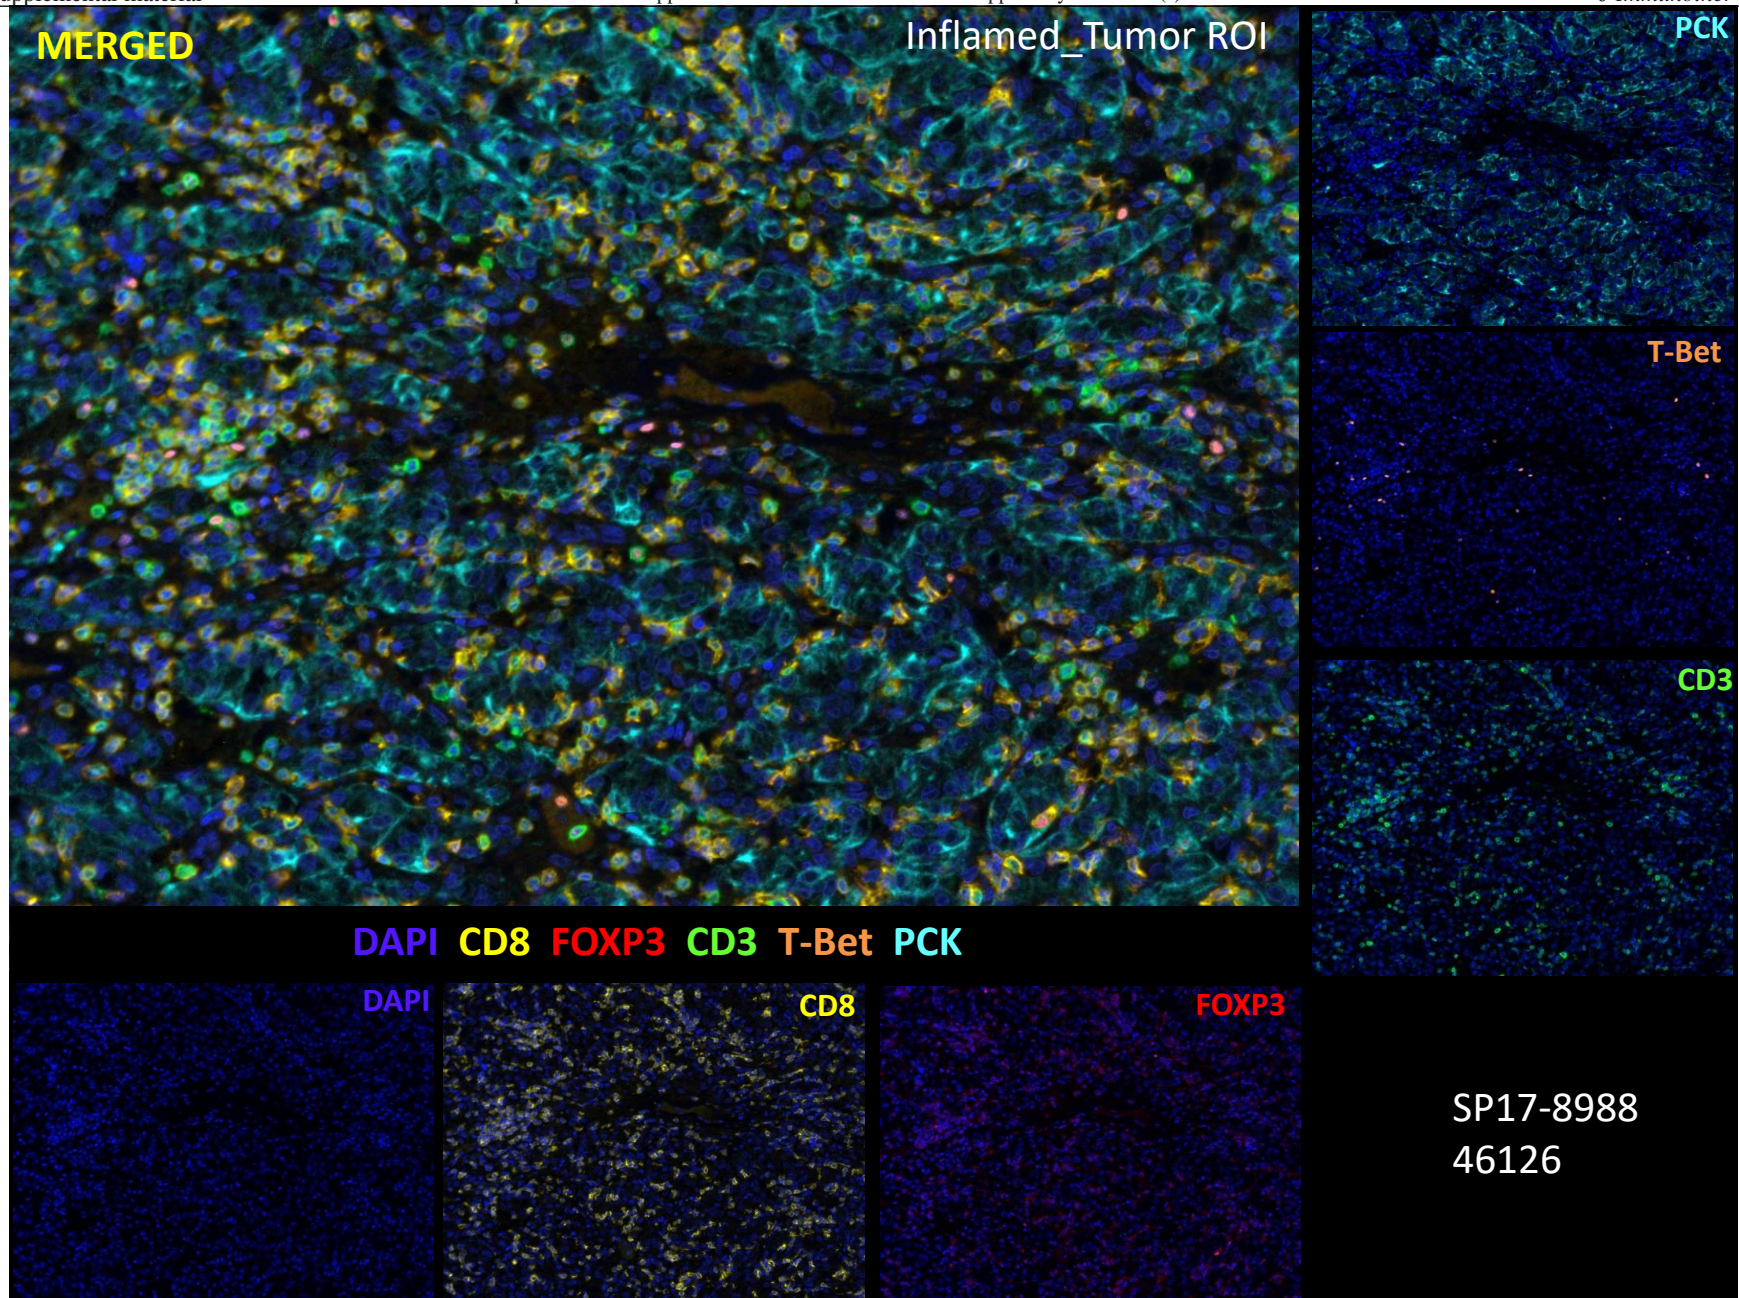

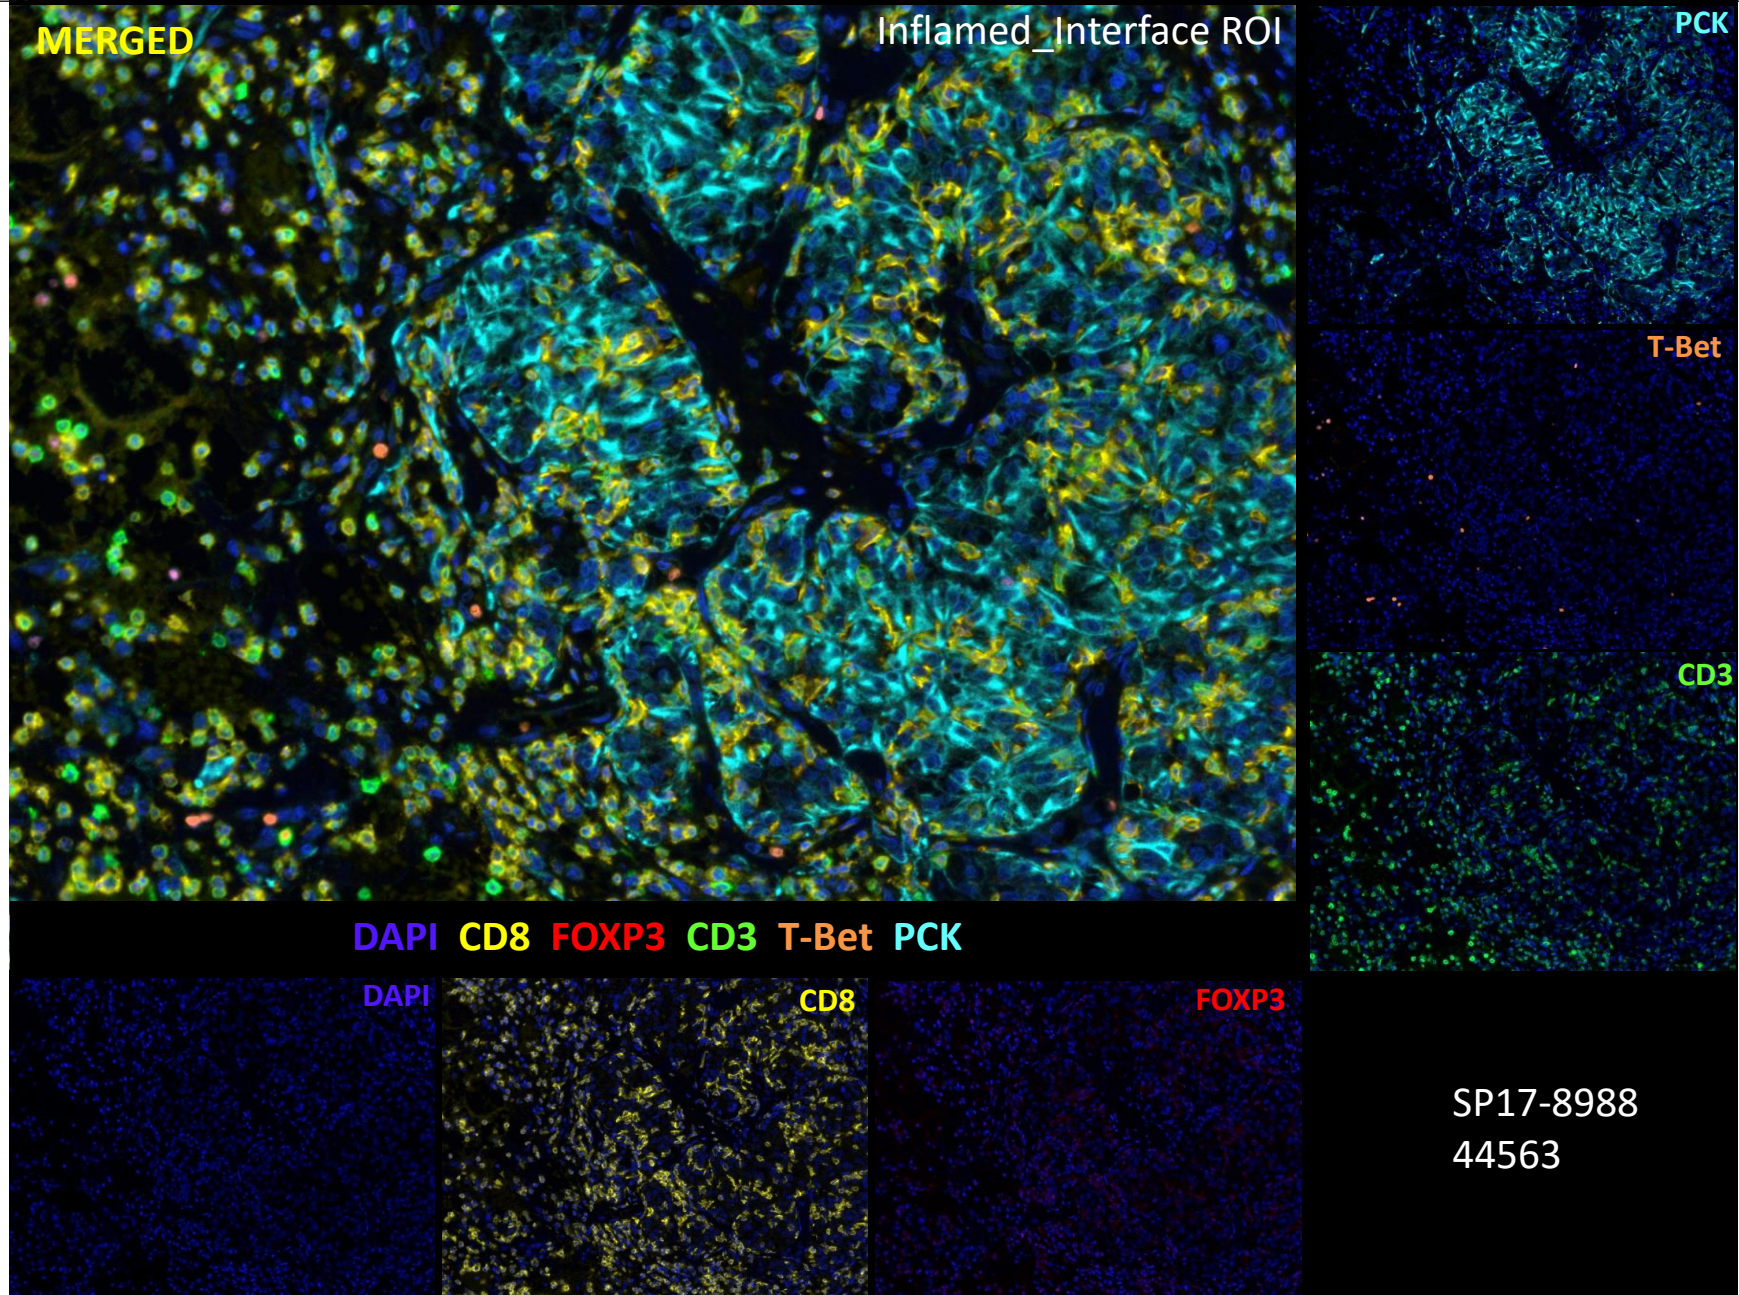

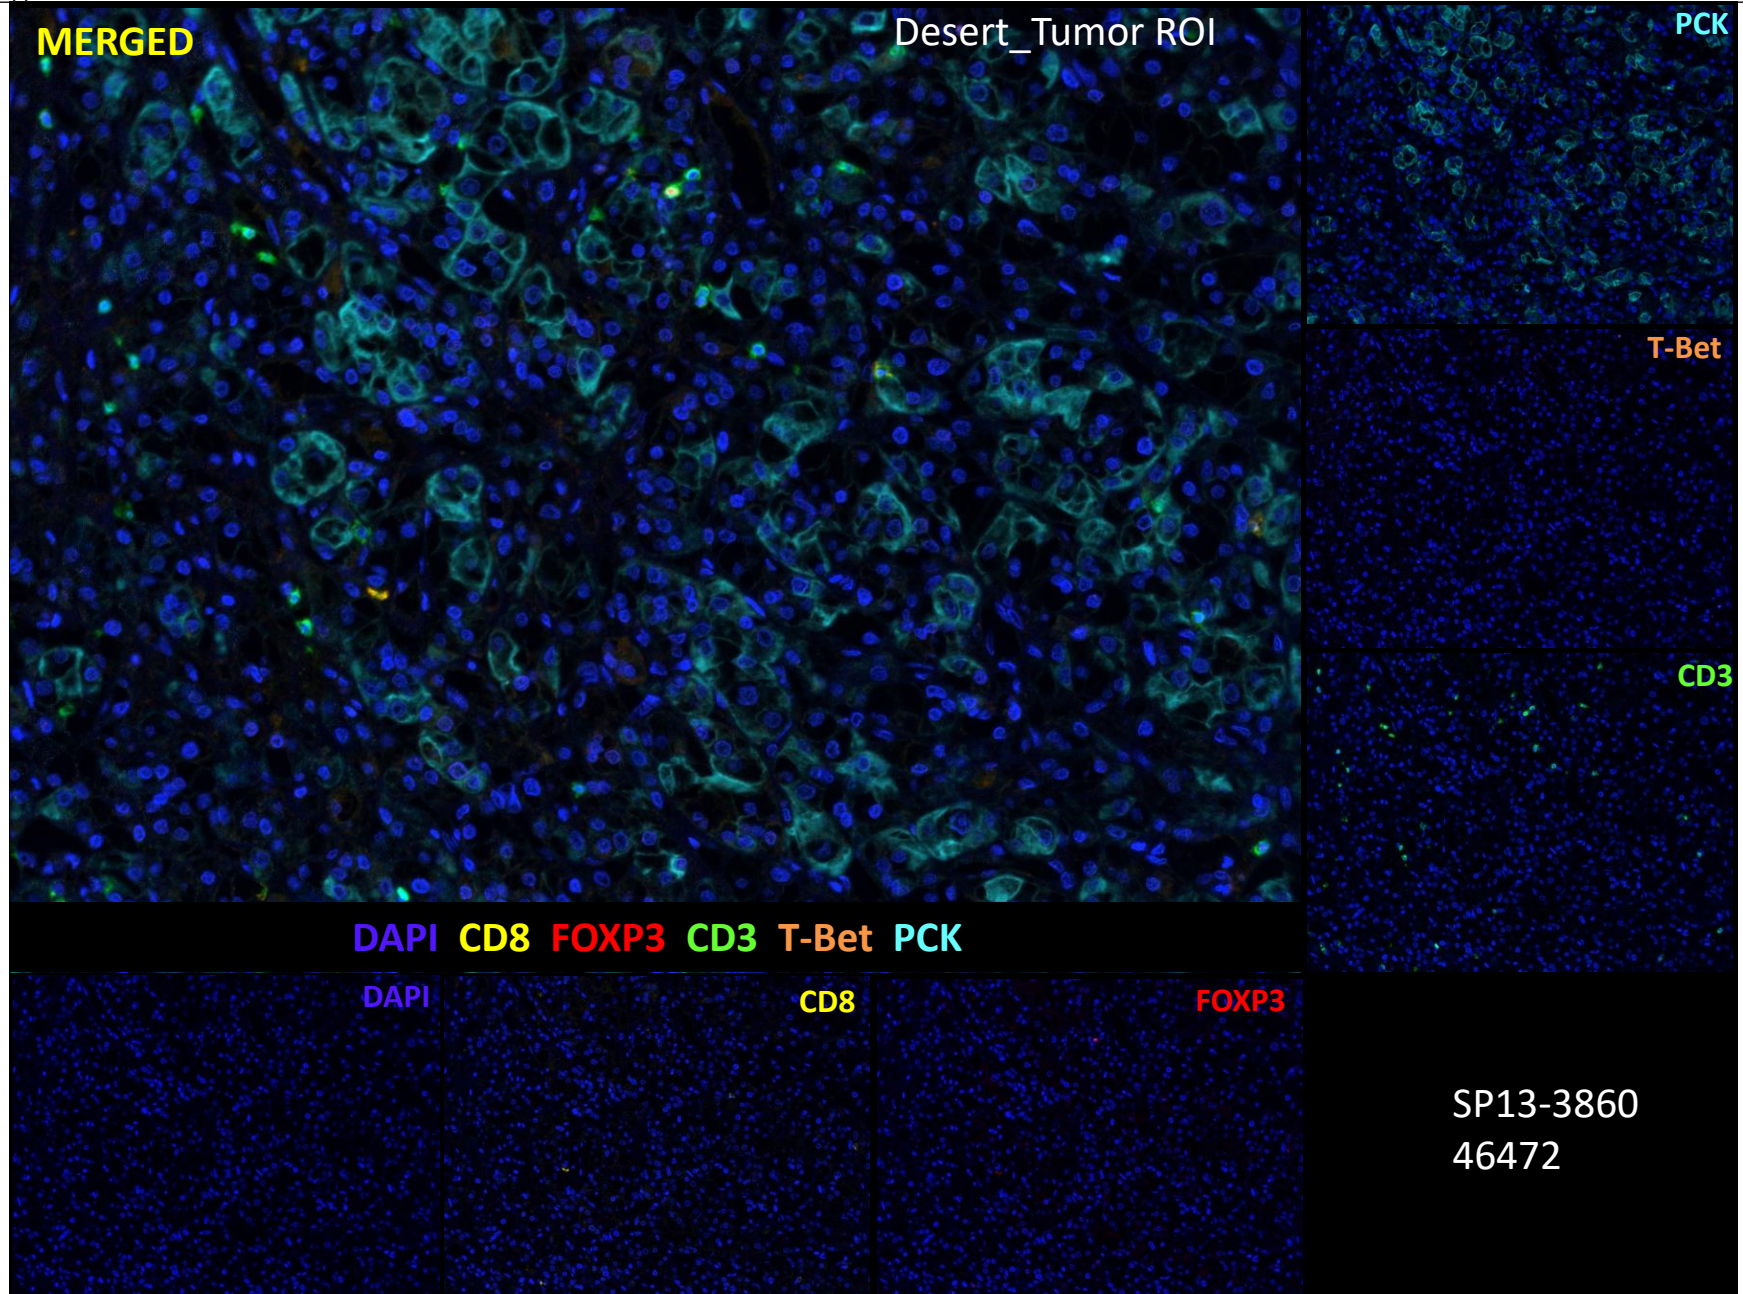

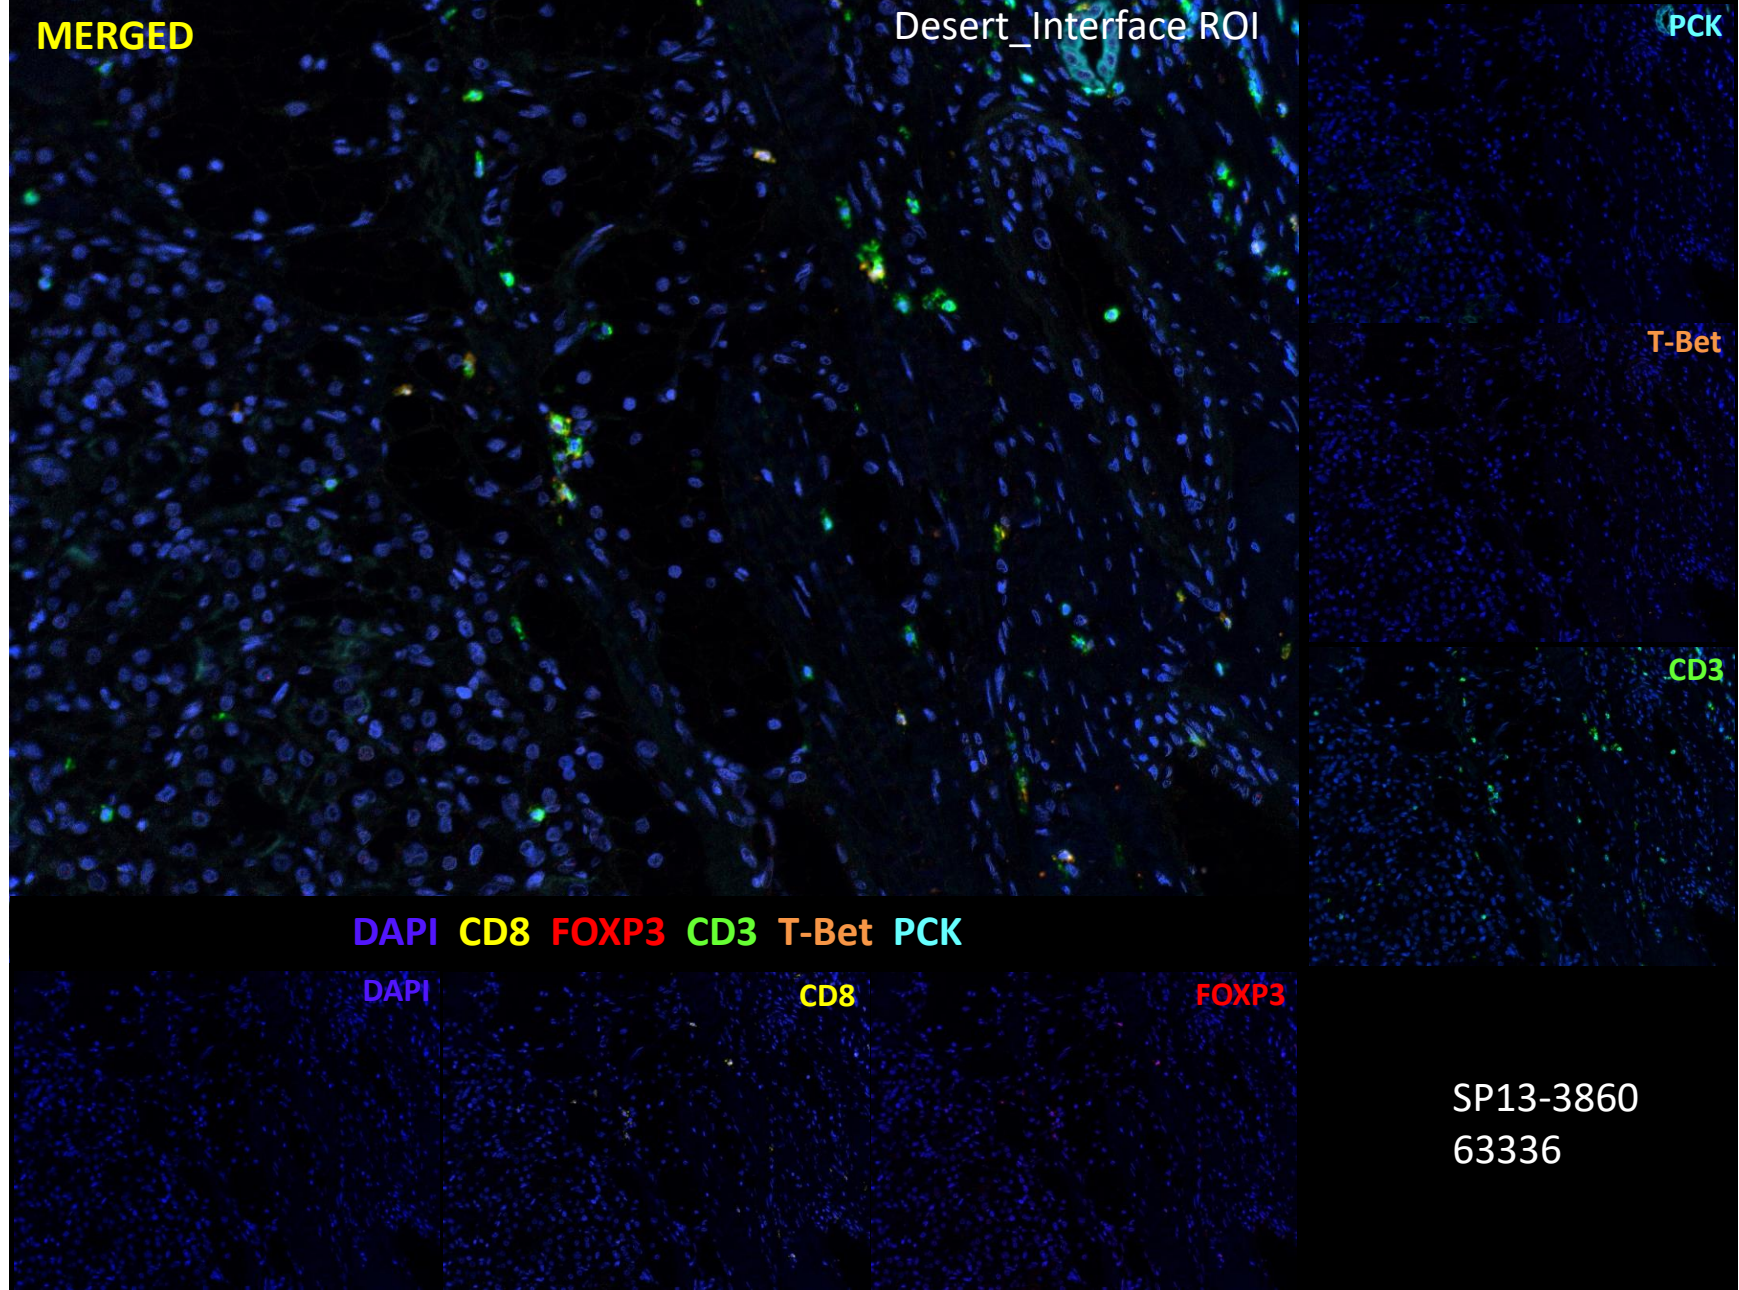

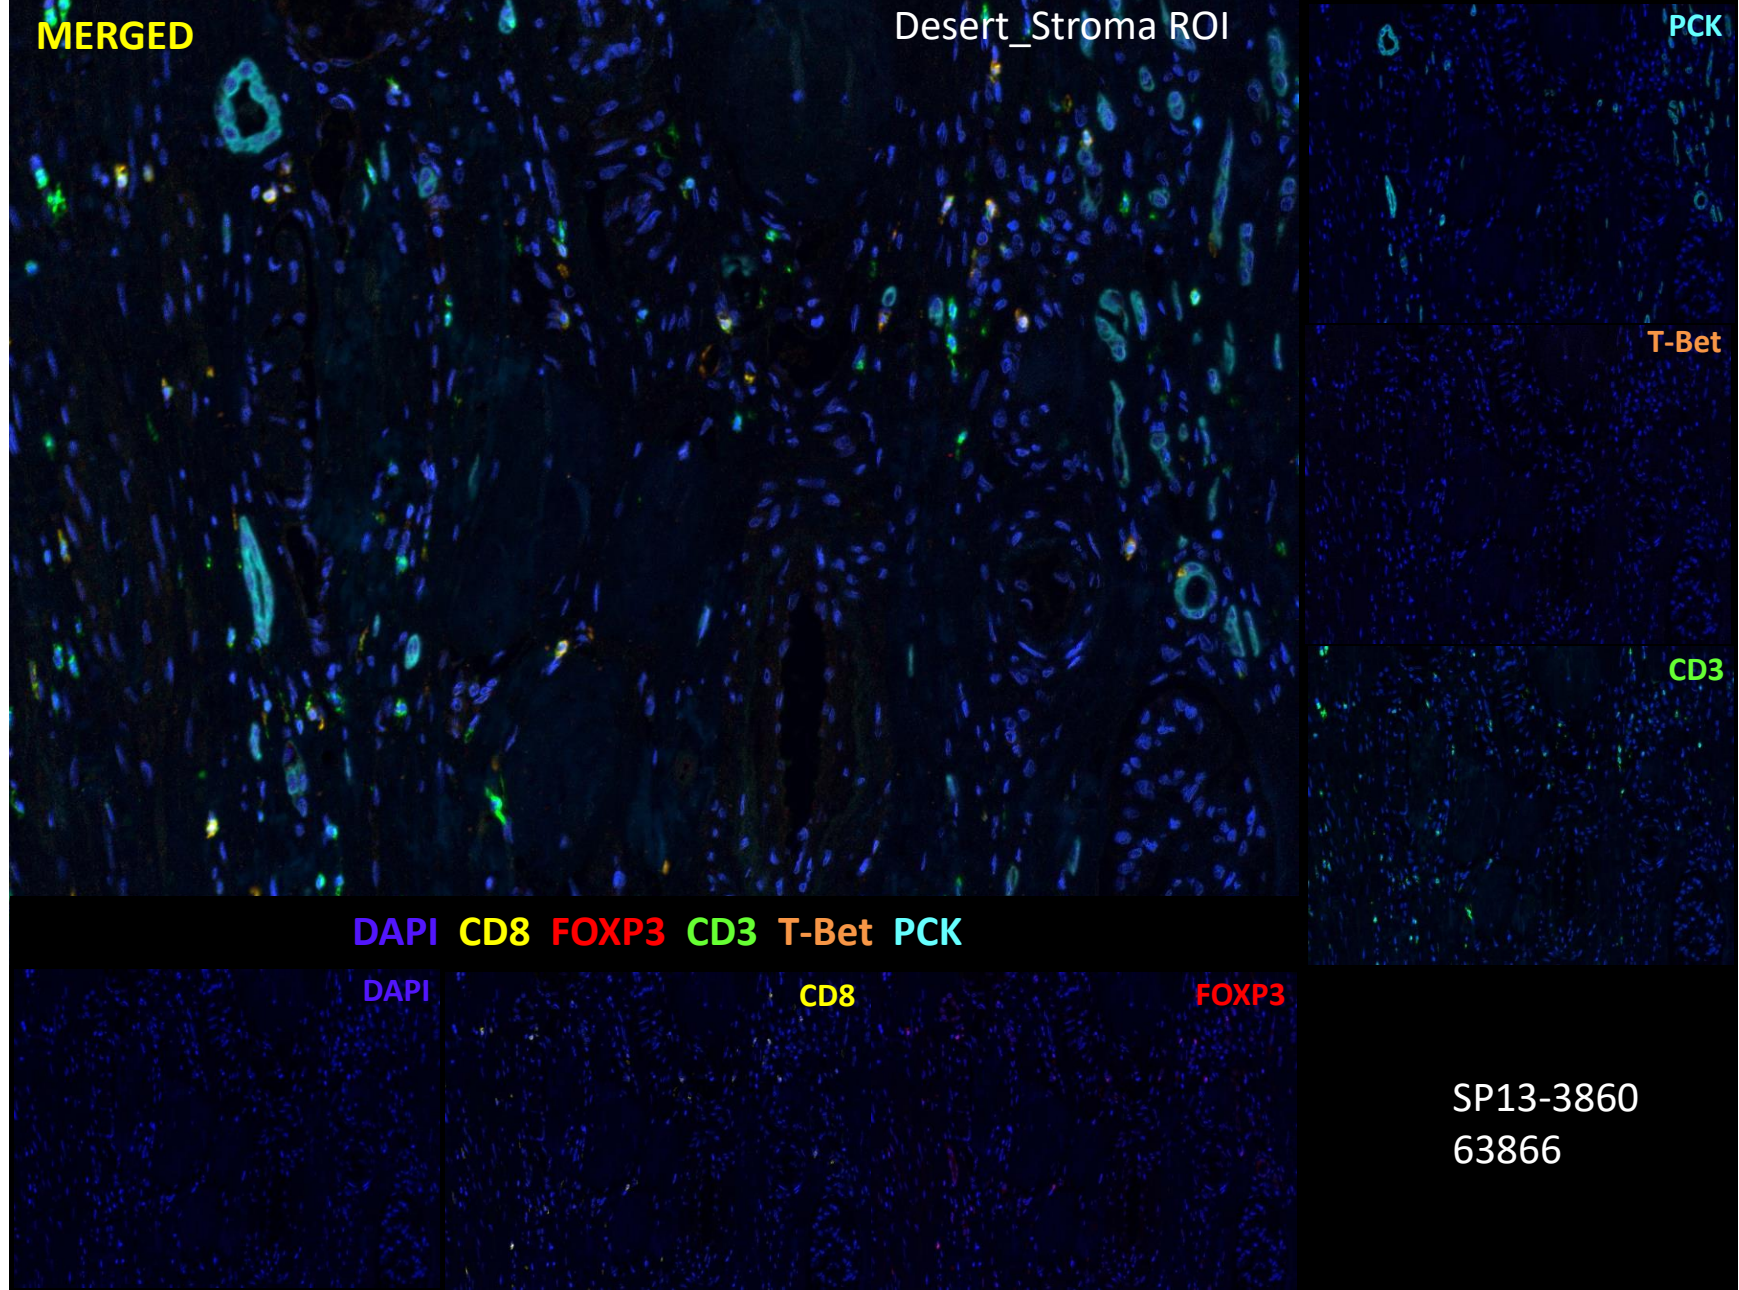

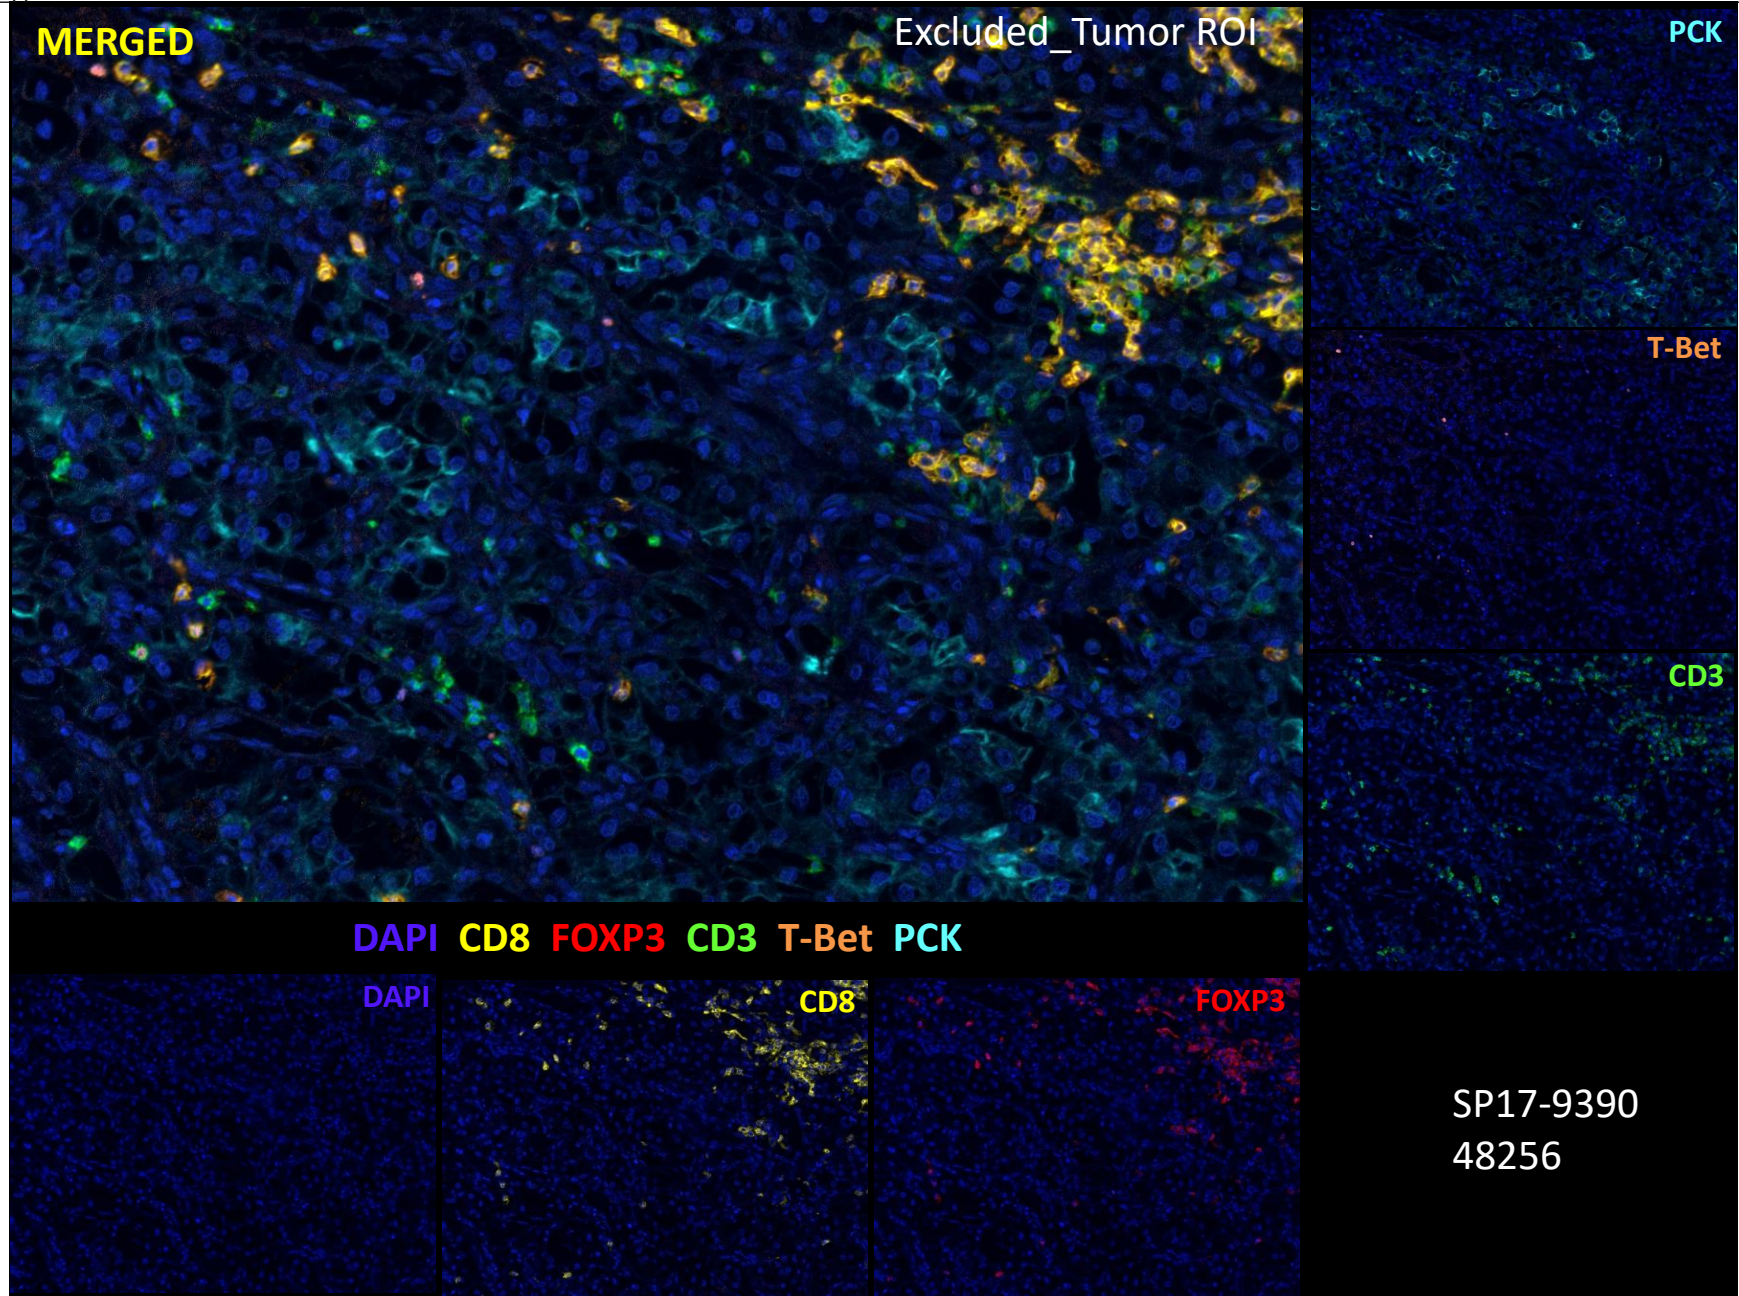

Supplement: jitc-2022-006195supp009_data_supplement.pdf [file jitc-2022-006195supp009_data_supplement.pdf]
